# Supplementary material
Source: MDPI journal article supplement (https://www.mdpi.com/2071-1050/16/2/761)
Supplement: s1 [file s1]

# Supplementary Materials

Table S1. Reliability test results of concepts.....1

Table S2. Validity test results of concepts. ....1

Table S3. PCA and explained variance. ....1

Table S4. Exploratory factor analysis. ....1

Table S5. Structural validity s analysis. ....2

Table S6. Distinguishing validity analysis. ....3

Table S7. Fitting indices for the conceptual mode.....3

## 1. Reliability and validity tests

To assess the scale's reliability, we calculated Cronbach's alpha index using SPSS 27.0, a widely recognized and extensively used metric. Internal consistency and reliability are generally considered adequate when Cronbach's alpha value exceeds 0.70. In this case, the values achieved indicated high data reliability, as shown in Table S1.

**Table S1.** Reliability test results of concepts.

| Concept                        | Nnumber of items | Standardized Cronbach's alpha index value |
|--------------------------------|------------------|-------------------------------------------|
| Landscape characteristics      | 4                | 0.776                                     |
| Function                       | 3                | 0.719                                     |
| Historical-cultural Importance | 3                | 0.863                                     |
| place identity                 | 9                | 0.850                                     |

**Table S2.** Validity test results of concepts.

| Concept                       | Index     |                        |                    |                  |
|-------------------------------|-----------|------------------------|--------------------|------------------|
|                               | KMO value | Approximate chi-square | Degrees of freedom | Significance (p) |
| Landmark landscape perception | 0.814     | 740.011                | 45                 | 0.000            |
| Place identity                | 0.852     | 582.217                | 28                 | 0.000            |

**Table S3.** PCA and explained variance.

| Concept                          | Rotate the sum of squares to load % |          | cumulation |
|----------------------------------|-------------------------------------|----------|------------|
|                                  | total                               | variance |            |
| 1 Place identity                 | 3.483                               | 19.351   | 19.351     |
| 2 Historical-cultural importance | 3.089                               | 17.163   | 36.514     |
| 3 Landscape characteristics      | 2.539                               | 14.104   | 50.619     |
| 4 Function                       | 2.092                               | 11.620   | 62.239     |

**Table S4.** Exploratory factor analysis.

| Concept        | Item variables | Principal component factor |   |   |   |
|----------------|----------------|----------------------------|---|---|---|
|                |                | 1                          | 2 | 3 | 4 |
| Place identity | PI6            | 0.788                      |   |   |   |
|                | PI7            | 0.744                      |   |   |   |
|                | PI1            | 0.715                      |   |   |   |
|                | PI4            | 0.606                      |   |   |   |
|                | PI3            | 0.530                      |   |   |   |
|                | PI8            | 0.510                      |   |   |   |

|                                |  |      |       |       |       |       |  |
|--------------------------------|--|------|-------|-------|-------|-------|--|
|                                |  | PI2  | 0.504 |       |       |       |  |
|                                |  | PI5  | 0.426 |       |       |       |  |
| Historical-cultural importance |  | HCS1 |       | 0.850 |       |       |  |
|                                |  | HCS2 |       | 0.839 |       |       |  |
|                                |  | HCS3 |       | 0.783 |       |       |  |
| Landscape characteristics      |  | LC4  |       |       | 0.801 |       |  |
|                                |  | LC3  |       |       | 0.733 |       |  |
|                                |  | LC2  |       |       | 0.709 |       |  |
|                                |  | LC1  |       |       | 0.616 |       |  |
| Function                       |  | F2   |       |       |       | 0.793 |  |
|                                |  | F1   |       |       |       | 0.713 |  |
|                                |  | F3   |       |       |       | 0.698 |  |

## 2. Exploratory factor analysis

**Table S5.** Structural validity s analysis.

|      | Route |                                | Standardized Estimate | S.E.  | T-value | P   | AVE   | CR    |
|------|-------|--------------------------------|-----------------------|-------|---------|-----|-------|-------|
| LC4  | <---  | Landscape Characteristics      | 0.603                 |       |         | *** |       |       |
| LC3  | <---  | Landscape Characteristics      | 0.641                 | 0.147 | 7.063   | *** | 0.458 | 0.770 |
| LC2  | <---  | Landscape Characteristics      | 0.688                 | 0.158 | 7.329   | *** |       |       |
| LC1  | <---  | Landscape Characteristics      | 0.763                 | 0.160 | 7.294   | *** |       |       |
| F3   | <---  | Function                       | 0.756                 |       |         | *** |       |       |
| F2   | <---  | Function                       | 0.576                 | 0.129 | 6.942   | *** | 0.464 | 0.720 |
| F1   | <---  | Function                       | 0.700                 | 0.135 | 7.357   | *** |       |       |
| HCS3 | <---  | Historical-cultural importance | 0.792                 |       |         | *** |       |       |
| HCS2 | <---  | Historical-cultural importance | 0.874                 | 0.093 | 12.552  | *** | 0.684 | 0.866 |
| HCS1 | <---  | Historical-cultural importance | 0.813                 | 0.095 | 11.746  | *** |       |       |
| PI1  | <---  | Place Identity                 | 0.584                 |       |         | *** |       |       |
| PI2  | <---  | Place Identity                 | 0.726                 | 0.149 | 7.705   | *** | 0.420 | 0.851 |
| PI3  | <---  | Place Identity                 | 0.660                 | 0.162 | 7.255   | *** |       |       |
| PI4  | <---  | Place Identity                 | 0.714                 | 0.149 | 7.620   | *** |       |       |

|     |      |                |       |       |       |     |
|-----|------|----------------|-------|-------|-------|-----|
| PI5 | <--- | Place Identity | 0.560 | 0.150 | 6.439 | *** |
| PI6 | <--- | Place Identity | 0.631 | 0.162 | 7.260 | *** |
| PI7 | <--- | Place Identity | 0.714 | 0.167 | 7.744 | *** |
| PI8 | <--- | Place Identity | 0.570 | 0.101 | 6.518 | *** |

\*\*\*  $p < 0.001$ .

**Table S6.** Distinguishing validity analysis.

|                                | Landscape Characteristics | Function | Historical-cultural Importance |
|--------------------------------|---------------------------|----------|--------------------------------|
| Landscape Characteristics      | 0.458                     |          |                                |
| Function                       | 0.167**                   | 0.464    |                                |
| Historical-cultural Importance | 0.200**                   | 0.158**  | 0.684                          |
| AVE square root                | 0.676                     | 0.681    | 0.827                          |

\*\*  $p < 0.01$ .

### 3. Model evaluation and hypothesis testing

**Table S7.** Fitting indices for the conceptual mode.

| Metrics to measure the degree of fit | Metric threshold | Estimated value | Estimated value(revised) |
|--------------------------------------|------------------|-----------------|--------------------------|
| Df                                   |                  | 129             | 126                      |
| $\chi^2/Df$                          | $\leq 3.000$     | 2.604           | 2.171                    |
| CFI                                  | $\geq 0.900$     | 0.863           | 0.902                    |
| GFI                                  | $\geq 0.800$     | 0.839           | 0.868                    |
| AGFI                                 | $\geq 0.800$     | 0.787           | 0.820                    |
| IFI                                  | $\geq 0.900$     | 0.865           | 0.904                    |
| RMSEA                                | $\leq 0.080$     | 0.089           | 0.076                    |
